# Supplementary material
Source: publisher figshare collection journal article supplement (https://sage.figshare.com/ndownloader/files/14701850)
Supplement: Supplementary file 1 [file 14701850]

### Appendix: List of Interview Respondents

- Abela, Carmelo (16 November 2017, Valletta), Minister of Foreign Affairs and Trade Promotion for the Labour Party.
- Attard, Rachel (14 November 2017, St. Julian's), News Editor at *The Independent*, Daily Newspaper.
- Borg, Ian (6 November 2017, Floriana), Minister of Transport and Infrastructure for the Labour Party.
- Bugeja, Josef (3 November 2017, Valletta), Secretary General of the General Workers Union, Malta's largest trade union.
- Bugeja, Ray (15 November 2017, Mriehel), Editor of the *Times of Malta*, Daily Newspaper.
- Busuttil, Simon (7 November 2017, Valletta), Former Leader of the Nationalist Party; Member of Parliament; former Member of the European Parliament (MEP).
- Camilleri, Carla (2 November 2017, Valletta), Assistant Director of the *Aditus Foundation*, Human Rights Advocacy NGO.
- Caruana, Justyne (22 November 2017, Rabat, Gozo), Minister of Gozo for the Labour Party.
- Cassola, Arnold (13 November 2017, Msida), Leader of the *Alternattiva Demokratika* (AD), Associate Professor in Comparative Literature at the University of Malta.
- Delia, Manuel (20 November 2017, Mqabba), Blogger about Maltese Politics.
- De Marco, Mario (15 November 2017, Valletta), Member of Parliament for the Nationalist Party; former Minister for Tourism, the Environment, and Culture.
- Doublet, Nicholas (6 November 2017, Floriana), Diocesan Archivist and Historian at the Catholic Church in Malta.
- Falzon, Michael (14 November 2017, Valletta), Minister of Family and Children's Rights for the Labour Party.
- Farrugia, Anglu (20 November 2017, Valletta), Speaker of the House of Representatives; former Deputy Leader of the Labour Party.
- Farrugia, Joseph (6 November 2017, Valletta), Director General of the Malta Employers' Association.
- Farrugia, Marlene (13 November 2017, Qrendi), Member of Parliament for the Democratic Party; former Member of Parliament for the Labour Party and Nationalist Party.
- Farrugia, Michael (9 November 2017, Valletta), Minister of Home Affairs and National Security for the Labour Party; former Minister for Family and Social Solidarity.
- Gonzi, Lawrence (20 November 2017, Valletta), Former Prime Minister for the Nationalist Party (2004-2013).
- Mercieca, Ryan (22 November 2017, Rabat, Gozo), President of the Gozo Youth Council; Candidate for the Nationalist Party.
- Muscat, Joseph (21 November 2017, Valletta), Prime Minister of Malta for the Labour Party; former Member of the European Parliament (MEP).
- Pullicino Orlando, Jeffrey (9 November 2017, Kalkara), Executive Chairman of the Malta Council for Science and Technology; former Member of Parliament for the Nationalist Party.

Sant, Alfred (6 December 2017, Brussels, Belgium), Former Prime Minister for the Labour Party (1996-1998), Member of the European Parliament (MEP).

Tabone, Anton (22 November 2017, Rabat., Gozo), Former Minister for Gozo for the Nationalist Party; former Speaker of the House of Representatives.
